# Supplementary material for: Notch1 regulates the functional contribution of RhoC to cervical carcinoma progression
Source: PubMed Central journal article supplement (PMC2813755; doi:10.1038/sj.bjc.6605451), 2009-12-01

# Supplementary figure 1

**a**

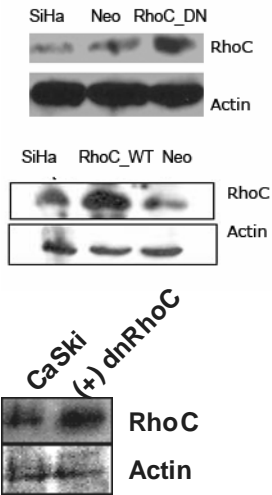

**b**

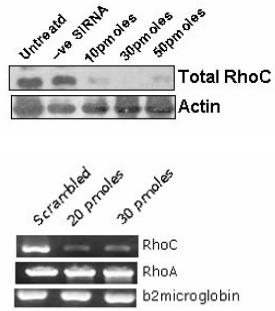

**c**

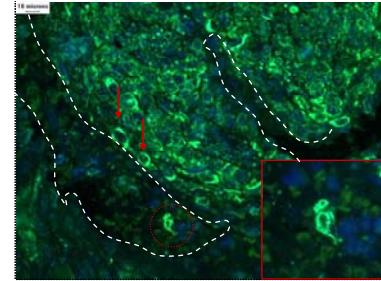

**d**

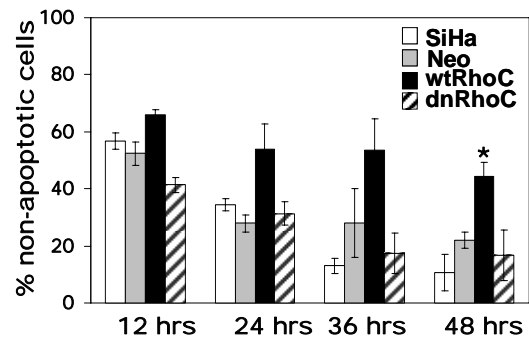

**e**

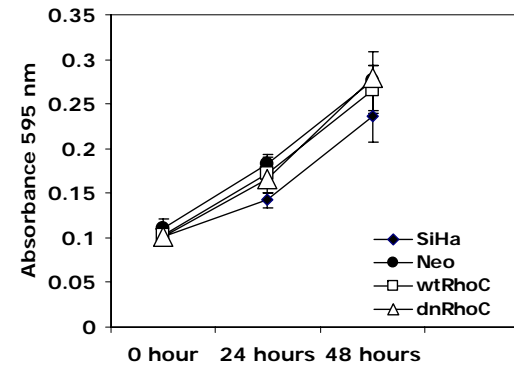

**a**

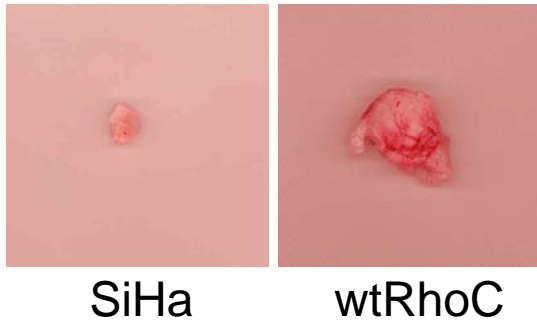

**b-i**

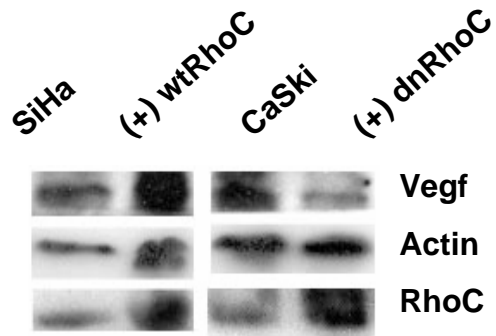

**b-ii**

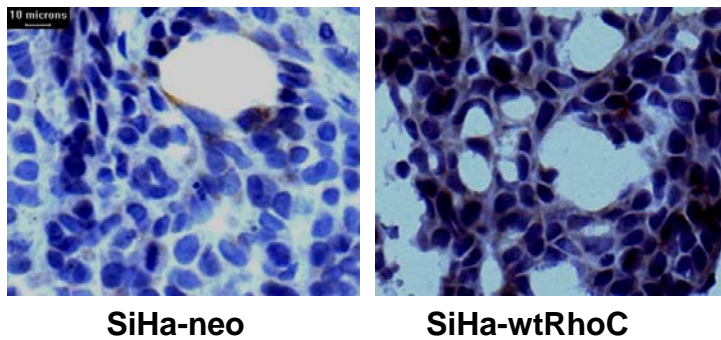

**c**

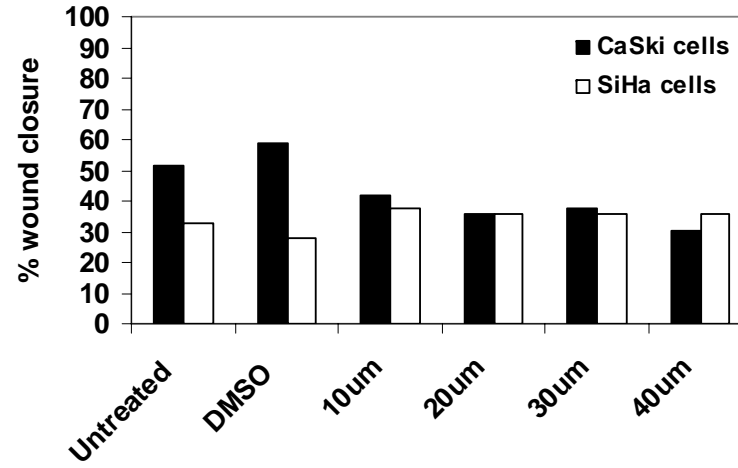

**d**

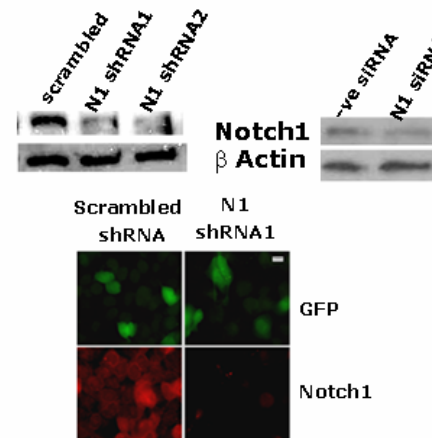

**e**

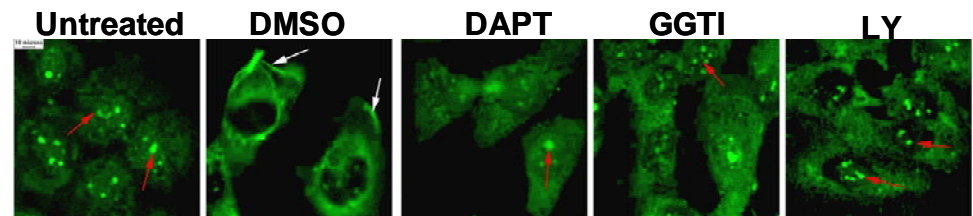

Supplement: 6605451x1.pdf [file 6605451x1.pdf]
